1  
2  
3  
4  
5  
6  
7  
8  
9  
10  
11  
12  
13  
14  
15  
16  
17  
18  
19  
20  
21  
22

Programmed bet hedging in yeast responses to osmotic stress

Yoshikazu Hirate<sup>1</sup>, Samuel Bottani<sup>2</sup>, Wyming Lee Pang<sup>3</sup> and Suzannah Rutherford<sup>1</sup>

1 Division of Basic Sciences, Fred Hutchinson Cancer Research Center, Seattle, WA, 2  
Laboratoire Matière et Systèmes Complexes, Paris Diderot, Paris, France 3 Department of  
Bioengineering, University of California San Diego, San Diego, CA

23 **Abstract**

24 Rapid reproduction contributes to evolutionary fitness but can be lethal under stress. Microbes  
25 are thought to limit risk in clonal populations by bet hedging; the stochastic expression of a low  
26 frequency of slow growing cells constitutively resistant to unpredictable environmental stresses  
27 including antibiotics. However fitness depends on rapid recovery and resumption of growth in  
28 potentially lethal environments whose severity and duration are also unpredictable. Here we  
29 describe trade-offs between osmotic stress-responsive signaling, survival and proliferation in 50  
30 ecologically distinct strains of budding yeast. By contrast with prior examples, programmed bet  
31 hedging responses were heritable, stress-specific and varied continuously in our population.  
32 During rapid growth strong osmotic stress signaling promoted survival. Weak signaling predicted  
33 lower viability, intense rebound signaling and robust recovery. Older cultures survived and  
34 adapted to unprecedented stress with fitness depending on reproducible, strain-specific  
35 proportions of cells with divergent strategies. The most 'cautious' cells survive extreme stress  
36 without dividing; the most 'reckless' cells attempt to divide too soon and fail, killing both mother  
37 and daughter. Heritable proportions of cautious and reckless cells generate a tunable, rapidly  
38 diversifying template for microbial bet hedging that resembles natural variation and would evolve  
39 in different patterns of environmental stress.

40 In order to understand the evolutionary trajectories of populations and species we need to  
41 understand the effects of natural genetic variation on mechanisms of development and  
42 expression of phenotypic variation. The mapping between genetic variation and the spectrum of  
43 attributes and behaviors upon which selection acts defines population-level properties such as  
44 evolvability (the capacity to evolve), robustness or canalization (the capacity to withstand genetic  
45 and environmental perturbation), and reaction norms (the optimization, within a given genotype,  
46 of phenotypic responses across different environments)<sup>1-3</sup>. Here we describe strain-specific  
47 differences in hyperosmotic stress responsive signaling and associated behaviors in a synthetic  
48 population of budding yeast.

49 The high osmolarity glycerol (HOG) signaling pathway is central to an elaborate stress  
50 response that reduces cellular damage and death in unpredictably changing osmotic  
51 environments where the balance between external solutes and free water pressure in the cell  
52 can change suddenly<sup>4</sup>. A main function of the HOG pathway is the production and accumulation  
53 of intracellular glycerol, which restores water balance and, as demonstrated by a large body of  
54 work from many labs, is essential for survival, adaptation and proliferation in hyperosmotic  
55 stress<sup>4-9</sup>. In the wild, yeast and other microorganisms must balance immediate survival against  
56 evolutionary fitness. Multiplicative fitness favors clonal populations that respond as rapidly as  
57 possible to improved conditions with earlier cell cycle reentry and proliferation<sup>10</sup>. On the other  
58 hand, individual survival requires that cells carefully sense the amplitude and direction of  
59 environmental change to more safely reenter the cell cycle after stress<sup>7</sup>. The HOG pathway  
60 consists of at least two highly-conserved, multi-component osmotic stress sensors linked to a  
61 parallel series of at least 15 kinases and accessory proteins that ultimately alter the activity of  
62 nearly 10% of the yeast genome<sup>4,6</sup>. The sheer numbers of genes involved in HOG signaling, their  
63 conservation, and their elaborate circuitry suggest that a nuanced response to osmotic stress  
64 has been crucial and strongly selected throughout evolutionary history. As the hyperosmotic  
65 stress response of budding yeast has well-characterized and accessible signaling and  
66 phenotypic traits that can be measured in the lab and are almost certainly under strong selection  
67 in nature<sup>4,6,7</sup>, this system is ideal for characterizing the mapping between signaling and behavior  
68 in a diverse population.

69 We measured osmotic stress signaling, survival and adaptation in both exponentially  
70 growing and nearly quiescent cultures of diploid yeast. Glycerol-3-phosphate dehydrogenase  
71 (*GPD1*) is rate-limiting for glycerol production<sup>11</sup> so we used the synthesis and accumulation of  
72 green fluorescent protein (GFP) integrated into the gene for *GPD1* as a proxy for HOG pathway  
73 activity. A synthetic population of diverse yeast genotypes was made by crossing *GPD1::GFP* in  
74 the genetic background of a standard laboratory strain (BY4742 *MAT $\alpha$* ) to a panel of wild  
75 and industrial genetic backgrounds –e.g. fifty different haploids of the opposite mating type  
76 extracted from globally diverse, sequence-validated strains of *Saccharomyces cerevisiae*  
77 deposited to the collection of the Royal Netherlands Academy of Arts and Sciences over the past  
78 100 years (CBS; Table 1 and Table S1).

## 79 **Osmotic stress signaling and behavior in young cultures**

80 The behavior of single cells before and after their exposure to osmotic stress was followed by  
81 time-lapse video microscopy of monolayer cultures in custom microfluidics devices<sup>12</sup>. When cells  
82 in exponential growth were exposed to sudden hyperosmotic stress, cell volume decreased, cell  
83 division and budding immediately stopped, and daughter cells retracted<sup>13</sup>. After a lag period  
84 proportional to the severity of the stress GFP fluorescence driven by the *GPD1* promoter began  
85 to accumulate in the cytoplasm of surviving cells. Cells that did not accumulate *GPD1::GFP* to  
86 high levels did not survive or adapt, developed large vacuoles, and began to die, remaining in  
87 view as shrunken cell ghosts. As GFP accumulated to saturation levels in the surviving cells,  
88 they adapted to the higher osmotic pressure, resumed cell division, budded and began to divide  
89 with a longer half time, producing daughter cells with similarly high fluorescence<sup>13</sup>.

90 Viability per culture and *GPD1::GFP* accumulation per cell were measured using flow  
91 cytometry of statistically large numbers of cells from all 50 strains (~10,000 cells / sample). The  
92 rate and extent of mean *GPD1::GFP* accumulation in exponentially growing cultures exposed to  
93 hyperosmotic media depended on the severity of the stress and the genetic background of each  
94 strain (Figures 1A and S1). Prior to the osmotic stress mean *GPD1::GFP* fluorescence and  
95 viability were uncorrelated. After 2 hours in moderate 0.75 M KCl viability decreased and  
96 became steeply correlated with accumulated *GPD1::GFP* (Figures 1B and C). As expected,  
97 natural variation in the strength of HOG signaling was directly responsible for variation among  
98 the strains in osmotic stress survival.

99

## 100 **Negative feedback drives a robust recovery**

101 The initially strong positive correlation between variation in *GPD1::GFP* accumulation and  
102 variation in viability reversed as cells adapted and began to divide (Figure 1C; 4 hours). This  
103 distinguished two phases of the response, an early phase (0 – 2 hours) when viability decreased  
104 markedly and acute HOG signaling promoted osmotic stress survival and a later phase (2 – 4  
105 hours) when viability recovered but became negatively correlated with HOG signaling and  
106 *GPD1::GFP* accumulation. The switch from positive to negative correlations might have indicated  
107 that stronger HOG signaling, initially beneficial, suddenly caused lower viability. However we  
108 think it likely that negative feedback increased signaling in the surviving cells of the less viable  
109 strains. Negative feedback controls, occurring at many levels and timescales, are present in  
110 essentially all of the varied mechanisms that act in concert to increase intracellular glycerol and  
111 restore water balance. For example (1) unequal water pressures activate osmotic stress sensors,  
112 glycerol channels and other pressure-sensitive components whose activities control and depend  
113 on water balance (e.g. see Figure 5 in Hohman 2002<sup>4,6</sup>), (2) *GPD1* indirectly controls and is  
114 controlled by osmotic stress-sensitive kinases that respond to upward and downward changes in  
115 water balance<sup>14</sup>, and (3) nuclear Hog-1 MAP kinase increases the transcription of phosphatases  
116 that restore its own cytoplasmic localization and basal activity<sup>15–17</sup>.

117 Consistent with acting negative regulation, we found there was a strong and highly  
118 significant correlation between early mortality (0 – 2 hour decreases in viability) and later  
119 accumulations of *GPD1::GFP* (2 – 4 hours; Table 2). We reasoned that cells and strains that  
120 adapt quickly experience lower and less sustained effects of osmotic stress (e.g. water loss) with  
121 more rapidly attenuated HOG pathway activity and lower *GPD1::GFP* accumulation.  
122 Conversely, surviving cells of strains that were slower to adapt and less viable would experience  
123 higher and more sustained osmotic stress (and likely other stresses). Prolonged osmotic stress  
124 would sustain HOG signaling and maintain *GPD1* transcription – also activated by general stress  
125 responses<sup>18</sup> – further promoting *GPD1::GFP* accumulation (e.g. negative feedback regulation of  
126 viability at the level of general stress responses). Indeed, even as *GPD1::GFP* and viability  
127 became negatively correlated, their *rates of change* remained positively correlated (Figure 1C, 2  
128 – 4 hours and insets; Table 2) prompting a parsimonious interpretation that osmotic stress  
129 signaling promotes adaptation and viability during both the initial and recovery phases of the  
130 response.

131 By 4 hours all strains had adapted to a new steady state in 0.75M KCl and later viability  
132 remained largely unchanged (Figure 1C inset, lower right). Interestingly, initial decreases in  
133 steady-state viability (0 – 2 hour mortality) were almost perfectly restored by 4 hours (Figure 1D)  
134 and, remarkably, by 6 hours early mortality and recovery were over 98% correlated ( $R^2 = 0.9852$ ,  
135  $P < 0.0001$ ; not shown). The biological robustness of adaptation and complete recovery of  
136 steady state viability further support the idea that negative feedback restores viability through  
137 continued activation of stress responses. Indeed, the continued accumulation of *GPD1* and  
138 glycerol – directly responsible for restoration of water balance and reduction of osmotic stress –  
139 suggests that intracellular glycerol concentrations integrate the cumulative activities of many  
140 facets of the osmotic stress response (e.g. provides a plausible biological mechanism for  
141 “integral feedback” that virtually assures perfect adaptation<sup>17,19</sup>; see included manuscript in  
142 preparation). However, despite their resilience, strains that were relatively slower to adapt would  
143 be ultimately less fit than rapidly adapting strains due to their higher death rate, slower recovery,  
144 and lower viabilities before and after adaptation.

145

#### 146 **Extreme stress resistance of older cultures**

147 By contrast with exponential cultures, when the aging yeast cultures (post-diauxic) were exposed  
148 to hyperosmotic media they survived and adapted after long periods in unprecedented conditions  
149 (Movies 1 and 2). As aging cultures deplete available glucose in their media they undergo a  
150 metabolic change called the diauxic shift<sup>20</sup>. During post-diauxic growth stress response proteins  
151 accumulate, cell division slows and then stops, and cells enter quiescence<sup>21</sup>. Remarkably,  
152 post-diauxic cultures survived up to 5 weeks in 3 M KCl (41/50 strains). They could not adapt and  
153 did not grow in 3 M KCl, but recovered rapidly and grew when plated on fresh isotonic media  
154 (‘static viability’; Figure S2). When we tested their limits of adaptation in increasing  
155 concentrations of KCl all but one strain could grow on 2.6 M KCl media and three strains could

156 grow on media containing 2.9 M KCl (Table 3). We are unaware of previous reports of such  
157 extreme osmotic stress survival or adaptation limits for budding yeast of any growth stage or  
158 genotype.

159

### 160 **Heterogeneity of cells in older cultures**

161 By contrast with cultures in exponential growth, in post-diauxic growth the genetically identical  
162 cells within each strain and culture were surprisingly heterogeneous in their signaling behaviors  
163 (compare Figures S1 and S3). Neither total *GPD1::GFP* fluorescence nor rates of change in  
164 fluorescence was strongly correlated with viability. After several hours in 2.5 M KCl *GPD1::GFP*  
165 increased sharply in one group of cells as they began to divide. More surprising, other cells  
166 induced *GPD1::GFP* to high levels, started to divide and then popped, killing both the mother and  
167 daughter (Movie 3). Another group of cells had slower signaling and cell division while the most  
168 ‘cautious’ groups of cells failed to signal or divide but remained in a cellular state of static viability  
169 without dividing.

170 We use flow cytometry to follow *GPD1::GFP* accumulation and survival of post diauxic  
171 cultures exposed to 2.5 M KCl as their osmotic stress responses evolved over 7 days. A  
172 Gaussian mixture model with Bayesian information criteria was used to assign the cells in each  
173 sample to four Gaussian distributions ( $G_0$ - $G_3$ ) described by eight parameters – means and  
174 covariances – numbered according to their increasing levels of fluorescence (Figure S3 and  
175 (<https://figshare.com/s/8147275b62eb8d4db6bf>)). Only *GPD1::GFP* pre-accumulated into cells  
176 of the  $G_3$  distribution during post-diauxic growth and *prior* to the osmotic challenge –therefore  
177 unrelated to osmotic stress signaling – predicted survival at any time. The amount of *GPD1::GFP*  
178 accumulated in  $G_3$  cells at time 0 predicted each strain's early but not later viability, and this  
179 relationship was better fit by 2<sup>nd</sup> order quadratic rather than linear functions of *GPD1::GFP* (Table  
180 4), suggesting early survival was higher in strains with intermediate  $G_3$  accumulations (more  
181 variation explained and lower mean square errors). Despite the fine-scaled characterization of  
182 osmotic stress signaling behaviors of the different groups of cells in each strain, none of the  
183 distributions learned by the Gaussian mixture model, neither pre-accumulated  $G_3$ , total  
184 *GPD1::GFP* fluorescence, nor stress-induced *GPD1::GFP* in any distribution, embodied features  
185 of osmotic stress signaling important for later survival.

186

### 187 **Continuous variation in stress responses**

188 In order to map osmotic stress-responsive signaling onto survival more directly we next  
189 quantified osmotic stress signaling behaviors of cells as they unfolded over time in 2.5 M KCl  
190 directly, unbiased by Gaussian assumptions or approximations. In brief, normalized levels of  
191 induced *GPD1::GFP* were binned (in a histogram or on a grid), creating a ‘sample vector’ of cell  
192 numbers in each of 100 successive intervals of fluorescence intensity (see methods). Next,  
193 sample vectors for increasing time points in each strain were linked to create time line vectors of  
194 sequential. For comparison of averaged strain behaviors the time line vectors were clustered

195 using a mean distance matrix, constructed from 17,000 randomly chosen permutations of the  
196 data over replicate samples and times (mean clusters; see methods). Finally, the fraction of  
197 permutations in which each strain grouped with more than half of the other strains in its mean  
198 cluster was used to rank that strain's behavior relative to the other strains in its group (clustering  
199 statistics; Table S2).

200 The unique signaling trajectories of most strains were highly reproducible (Figure S3  
201 and (<https://figshare.com/s/8147275b62eb8d4db6bf/>)). Based on their shared and  
202 strain-specific (heritable) signaling behaviors the 50 strains rapidly converged onto two large  
203 groups made up of six mean clusters (Figure 2). Each strain could be further ordered within and  
204 between mean clusters based on their clustering statistics, with their rank order describing  
205 increasingly rapid accumulations of *GPD1::GFP* and 'reckless' signaling (Figure S4). Tellingly,  
206 both mean cluster and rank predicted viability over time (Figure S5 and Table 4; respectively)  
207 thereby confirming the biological relevance of 'cautious' versus 'reckless' osmotic stress  
208 signaling, validating our clustering method and supporting the role of natural osmotic stress  
209 signaling differences between strains in shaping variation in fitness during osmotic stress.

210

### 211 **Evidence for bet hedging**

212 As cautious and reckless behaviors were found both within and between strains, we wondered  
213 whether bet hedging, the expression of alternate, conditionally-adaptive phenotypes within a  
214 clone of genetically identical organisms<sup>10,22-25</sup>, could explain the observed variation in osmotic  
215 stress signaling and survival. For example, a low frequency of post-diauxic cells that are  
216 stress-resistant under normal growth conditions could represent the stochastic, pre-adaptive bet  
217 hedging previously documented in yeast and bacteria<sup>26,27</sup>. By contrast with previously  
218 described microorganism bet hedging, the ranked responses to osmotic stress responses were  
219 heritable, stress-specific and uncorrelated with pre-adapted osmotic stress resistance acquired  
220 during post-diauxic growth. The viability of different strains varied depending on their rank and  
221 the severity of the osmotic environment. Higher-ranked strains with more aggressive osmotic  
222 stress signaling strategies favored milder conditions, but with increasing time in extreme osmotic  
223 stress more cautious strains and behaviors became more fit (Table 4). For example, W178 at  
224 rank 50 was most viable in moderate 0.75 M KCl, but the optimum shifted to the strain at rank 25  
225 after 20 hours in 2.5 M KCl, 20 after 72 hours, and 9.6 after 168 hours (1 week). After 168 hours,  
226 viability had decreased most among the most reckless strains (Figure S5).

227 The correlation between relative fitness and signaling behavior under increasing  
228 osmotic stress provided strong empirical evidence for bet hedging<sup>23</sup>. To confirm that the  
229 increasing survival of strains with cautious signaling behaviors was correlated with the amount of  
230 osmotic stress experienced by the cells and not simply their time in culture, we tested the idea  
231 that the severity of osmotic stress increases with time in severe osmotic conditions. We again  
232 incubated cultures in 2.5 M KCl for 168 hours, but they were first exposed to a mild pre-stress (2  
233 hours in 0.5 M KCl) to pre-induce osmotic stress proteins and make them more resistant to

234 subsequent stress. If optimum rank depended solely on time, independent of the degree of stress  
235 experienced by the different strains, then it should be unaffected by the short pre-stress.  
236 However optimum rank shifted toward more reckless behaviors (rank 9.6 to rank 18;  $P < 0.0001$ )  
237 in response to the pre-stress and viability increased by  $\sim 10\%$ , as expected if the pre-treated cells  
238 experienced lower osmotic stress.

239 After 168 hours in 2.5 M KCl the most reckless cells in the highest-ranking strains  
240 began to selectively die and disappear. For example, the replicate cultures of strain W242  
241 (rank 49) that had lower viability also had fewer cells with high accumulations of *GPD1::GFP*,  
242 smaller G3 distributions, and correspondingly larger distributions with lower mean *GPD1::GFP*  
243 (Figure 3A). The selective loss of cells with the highest accumulations of *GPD1::GFP* could  
244 indicate that *GPD1::GFP* levels simply decrease over time. However, G3 distributions were  
245 stable over most time points and in most strains. We think it more likely that after 168 hours in  
246 2.5 M KCl the most aggressive cells in the highest-ranking strains attempt to divide and fail (e.g.  
247 Movie 3). Rapid signaling and adaptation, a fitness advantage in milder conditions, becomes a  
248 liability in severe or prolonged osmotic stress. On the other hand static viability – the survival of  
249 non-dividing cells in 3 M KCl (Figures 2B and S2) – would usually dramatically reduce  
250 evolutionary fitness but it allows more cautious cells and strains to survive severe stress.

251

## 252 **Evolution of bet hedging**

253 We've shown that heritable osmotic stress signaling behavior predicts survival in increasing  
254 severity and duration of osmotic stress. Since cautious and reckless strains reliably express a  
255 range of cells with different behaviors and fitness depending on the environment, we wondered  
256 whether a simple, 2-state bet hedging model with heritable proportions of cautious and reckless  
257 cell types could account for the observed variation in osmotic stress signaling and explain the  
258 complex relationship between rank and viability. We reasoned that aggressive osmotic stress  
259 signaling with rapid recovery and resumption of growth would have been the default, ancestral  
260 behavior and asked whether a heritable probability of cautious signaling and behavior could have  
261 arisen in response to the unpredictable severity and duration of potentially lethal osmotic  
262 environments. In short, we assumed a heritable probability of daughters with cautious signaling  
263 and behavior ( $P$ ) and asked whether it could evolve.

264 We modeled the relative fitness of strains with different strategies  $P$  ( $0 \leq P \leq 1$ ) after  
265 several generations of growth under abrupt changes between three very general osmotic stress  
266 environments (<https://figshare.com/s/2c03544aef0c40cc86c2/>). These environments discriminate  
267 cautious versus reckless behaviors: (E0) a permissive environment in which both cautious and  
268 reckless cells grow equally well, (E1) a restrictive environment approximating moderate osmotic  
269 stress reckless cells divide and cautious cells survive without dividing, and (E2) a killing osmotic  
270 stress where reckless cells die and cautious cells survive without cell division. After several  
271 generations under each of the 9 possible environmental shifts between the three environments,  
272 we calculated the relative fitness (cell numbers) of each strategy. Most environmental shifts



273 favored an optimum strategy of either all cautious ( $P = 1$ ) or all reckless cell types ( $P = 0$ ; Figure  
274 3C). Strictly intermediate strategies ( $0 < P < 1$ ) and bet hedging prevailed only when the osmotic  
275 environment shifted from moderate to more severe, with the optimum  $P$  depending on the  
276 number of generations in the first environment ( $E1 \rightarrow E2$ ). Shorter lag periods – corresponding to  
277 less severe osmotic conditions – and more cell divisions in  $E1$  initially favor lower  $P$  and a higher  
278 proportion of reckless cells. Longer lag periods – corresponding to more severe conditions and  
279 fewer cell divisions – favor higher  $P$  and a higher proportion of cautious cells. Indeed,  
280 worsening osmotic environments are common in nature (for example, during fermentation or  
281 drying). The post-diauxic cells and strains in our experiments experienced a worsening  
282 environment with increasing time in osmotic stress; as predicted by the model, lower-ranked  
283 strains with more cautious signaling behaviors, longer lag periods and fewer attempted cell  
284 divisions were increasingly fit over time and with an increasing severity of osmotic stress (Table  
285 4).

286 While a 2-state model of bet hedging behaviors in three discrete environments is  
287 almost certainly overly simplistic relative to yeast in nature (and up to four learned distributions of  
288 cell types that best fit our data; Figure S3), it provides a conceptual framework for understanding  
289 variation in osmotic stress signaling strategies and generates testable hypotheses for further  
290 studies. Bet hedging in microorganisms has been previously thought to arise almost exclusively  
291 through stochastic switching with a low probability of alternate phenotypes that are independent  
292 of the environmental challenge<sup>10,26–28</sup>. By contrast, the variation in osmotic stress signaling and  
293 behavior we report here is a heritable, programmed response to osmotic stress. Strains display a  
294 wide range of cells displaying cautious behavior making this example one of few known for a  
295 microorganism that is similar to the rapidly diversifying, within-clutch bet hedging strategies of  
296 plants and animals<sup>10,28</sup>. If the heritable probabilities of cautious cells and behavior were  
297 sculpted by selection, milder and/or slowly worsening osmotic environments would generate  
298 more reckless strains (e.g. W242, rank 49 isolated from rotting banana; W282, rank 48 isolated  
299 from fermenting fruit) and more severe or rapidly deteriorating osmotic environments would  
300 generate more cautious strains and behavior (e.g. W455, rank 1 from molasses; W217, rank 4  
301 from sugar cane syrup). Indeed, even though our synthetic population is represented  
302 heterozygous wild/lab diploids rather than the inbred strains the general environment from which  
303 each strain was isolated weakly predicted its aggressiveness and plausibly suggests adaptation  
304 to growth in slowly rotting fruit or during wine fermentation favors more aggressive osmotic stress  
305 behaviors than growth in more severely hyperosmotic sugar cane syrups, molasses or olive  
306 wastes.

307 Classical evolutionary models assign fitness directly to genotypes, mutations, and  
308 mean trait values without consideration of the genotype-to-phenotype map; molecular models  
309 provide detailed mechanistic outlines of development but rarely consider the effects of natural  
310 genetic variation. The osmotic stress response is extensively characterized in a few strains and  
311 genotypes but until now osmotic stress signaling and behavior in a population had not been

312 examined. Labyrinthine developmental mechanisms, that are themselves controlled by genetic  
313 variation, translate genotypes into phenotypes with a variable fidelity that allows for the possibility  
314 of phenotypic heterogeneity and the evolution of bi-stable states<sup>29</sup>. Our view of osmotic stress  
315 signaling and response on a backdrop of natural variation enabled the identification of negative  
316 feedback controlling a robust recovery of steady-state viability in exponential growth. In  
317 post-diauxic cultures, continuous heritable variation in the distribution of cautious to reckless  
318 osmotic stress signaling is a risk spreading strategy. Microorganisms in nature spend a large  
319 amount of their time in post-diauxic or quiescent phases<sup>21</sup>. Our simple, 2-state model  
320 demonstrates how post-diauxic cells and strains can balance constraints between survival and  
321 evolutionary fitness through programmed bet hedging responses adapted to different patterns of  
322 environmental stress.

323 **Materials and methods**

324 **Strain acquisition and deposition**

325 Over 200 unique wild and industrial diploid strains of *Saccharomyces cerevisiae* were obtained  
326 from the fungal diversity collection of Centraalbureau voor Schimmelcultures (CBS), an institute  
327 of the Royal Netherlands Academy of Arts and Sciences in Utrecht, Netherlands  
328 (<http://www.cbs.knaw.nl/index.php/collection/>). Strains modified for this report are listed in  
329 Tables 1 and S1. They have been deposited to the Yeast Genetic Resources Lab of the  
330 National BioResource Project in Osaka, Japan ([http://yeast.lab.nig.ac.jp/nig/index\\_en.html/](http://yeast.lab.nig.ac.jp/nig/index_en.html/)).

331

332 **Haploid *MATa* library of wild and industrial genotypes**

333 The first step in our library construction pipeline was to delete the *HO* locus of each strain by  
334 replacement with the KanMX4 marker gene and “barcodes” to permanently label each strain  
335 while preventing homothalium (Table S1)<sup>30,31</sup>. The KanMX4 gene was PCR-amplified for this  
336 purpose with primers containing the barcode sequences<sup>32</sup>. Next, kanamycin-resistant  
337 transformants were grown in pre-sporulation medium containing 10% glucose followed by  
338 sporulation under starvation conditions in 1% potassium acetate. Although the strains differ in  
339 their sporulation efficiency and optimal conditions (<http://www.cbs.knaw.nl/Collections/>), we  
340 found it was most efficient to put strains through repeated rounds of a general sporulation  
341 protocol rather than trying to optimize the conditions for each strain. The *MATa* haploids were  
342 identified by “schmoo” formation in 96-well plates containing alpha factor and confirmed by  
343 crossing to a G418-sensitive, clonNAT-resistant *MATalpha* tester strain and selection on  
344 double-antibiotic plates. Next we deleted the *URA3* gene using a standard gene deletion  
345 method and selected the *ura3Δ* clones by replica plating and selection on 5-FOA. Finally, *ho*  
346 and *ura3* deletions and the barcode sequences of each strain were verified by PCR and  
347 sequencing. Forty-nine wild strains and a laboratory strain meeting these criteria were used in  
348 this study (see Tables 1 and S1 for strain details).

349

350 **Synthetic population of *GPD1::GFP* wild/lab diploids**

351 The *MATalpha* laboratory strain BY4742 was transformed to create a stably integrated  
352 *GPD1::GFP* reporter (G01) using a deletion cassette containing a *URA3* marker for selection on  
353 SC-URA plates<sup>32,33</sup>. A synthetic “population” of diploids was created by mating each strain in  
354 the library of *MATa* haploids (50 strains) with G01 by mixing on SC-URA plates for 2 hours  
355 followed by streaking onto selective SC-URA+G418 plates. The 50 resulting wild/lab diploid  
356 strains all have 50% of their genes from the *MATalpha GPD1::GFP* reporter in the BY4742  
357 laboratory strain background (Table 1). After mating, it was necessary to screen for triploids or  
358 tetraploids, which express higher levels of *GPD1::GFP* and have higher tolerance to osmotic  
359 stress. Overnight cultures of wild/lab yeast were diluted 50-fold into fresh YPD+G418 and grown  
360 for an additional 4 hours, fixed by 1:3 dilution into cold ethanol and resuspended in 20 ug/ml  
361 RNase A to digest ribonucleic acids. Digested cells were stained with 30 ug/ml propidium

362 iodide to label DNA and ploidy was determined by flow cytometry (FACS Calibur; Becton  
363 Dickinson).

364

### 365 **Exponential and post-diauxic cultures**

366 Fresh cultures were generated for each experiment by replicating frozen 96-well plates onto  
367 YPD+G418 agar followed by 4 days growth at 21° C. To obtain mid-exponential (ME) cultures,  
368 freshly patched cells were grown in 2 ml liquid YPD+G418 cultures at with rotation (72 rpm) at  
369 21° C. for 2 days. Two microliters of these suspensions were diluted into 2 ml of liquid  
370 YPD+G418 and grown at 21° C. for 14 hours (e.g. 5 rounds of cell division on average, with  
371 strain ODs ranging from 0.80 – 1.44). For post-diauxic (PD) cultures, freshly patched cells were  
372 grown in 2 ml liquid YPD+G418 cultures at with rotation (72 rpm) at 21° C. for 4 days. Strains  
373 cultured up to 8-days post-diauxic growth were tested for osmotic stress resistance and we found  
374 that 4 day cultures were already maximally resistant (not shown).

375

### 376 **Plating assays**

377 To determine the adaptation limit of each strain, post-diauxic cultures were diluted to OD<sub>600</sub> of 0.1  
378 with exhausted YPD (to prevent re-growth), sonicated for 5 seconds at a low setting (2.5; Sonifier  
379 Cell Disrupter, Model W185) and plated (5 ul) on 96-well plates containing YPD without KCl  
380 (controls) or with KCl ranging from 2.0 to 3.0 M. Growth was tested after up to 2 months at 21° C.  
381 Viability and static survival under osmotic stress (Figures 2B and S2) was determined after  
382 incubation in liquid media with increasing concentrations of KCl followed by plating on  
383 iso-osmolar, YPD agar plates.

384

### 385 **Microfluidics**

386 We used custom made microfluidics devices with two fluid inputs as described<sup>12</sup>. When  
387 performing microfluidics with post-diauxic cells, post-diauxic cultures were inoculated into devices  
388 with exhausted YPD medium and allowed to stabilize for a few hours prior to osmotic stress.  
389 Experiments were run at ambient room temperature and observed using a Nikon TS100 inverted  
390 microscope. Recordings were made using a Photometrics CoolSnap HQ2 digital camera  
391 operated by Metavue (Molecular Dynamics). Analysis of acquired images was performed using  
392 Image J software (<https://imagej.nih.gov/ij/>).

393

### 394 **Flow cytometry**

395 For flow cytometry after osmotic stress 4 ml of PBS was added to each culture. Cells were  
396 isolated by centrifugation and resuspended in 1 ml PBS, transferred to FACS tubes, sonicated (5  
397 seconds at level 3, Sonifier Cell Disrupter, Model W185) and stained with 3 ug/ml propidium  
398 iodide (PI) to monitor viability. After 20 min GFP fluorescence and viability were quantified  
399 using a FACS Calibur flow cytometer (Becton Dickinson) that had been calibrated prior to each  
400 use with SPHERO Rainbow Fluorescent Particles, 3.0 – 3.4 um (BD Biosciences). Flow

401 cytometry data were gated using magnetic windows in FlowJo software to eliminate cell  
402 fragments, clumped and dead (PI-positive) cells (<http://www.flowjo.com/>). Raw data for the  
403 viable cells in each sample (forward scatter, side scatter and GFP fluorescence data of up to  
404 10,000 cells/sample) were extracted into an SQL database for analysis as described  
405 (<https://figshare.com/s/52ef966b16cba7f41d7f/>). Cell data were scaled for linearity (e.g.  
406 FLH1<sup>1/3</sup>, FSC<sup>1/3</sup>, SSC<sup>1/2</sup> for GFP fluorescence, forward scatter, and side scatter, respectively; see  
407 (<https://figshare.com/s/8147275b62eb8d4db6bf/>) for scalings and 3 dimensional (3-D)  
408 projections of cells). Distributions of *GPD1*::GFP accumulation in exponential cultures were  
409 unimodal and therefore well-defined using a single mean (e.g. Figure S1 and  
410 (<https://figshare.com/s/8b709fd16cccbabc2a5a/>)). By contrast, *GPD1*::accumulations of cells in  
411 post-diauxic cultures were clearly multimodal at many time points (Figure S3 and  
412 (<https://figshare.com/s/8b709fd16cccbabc2a5a/>)). We identified Multi-normal distributions of  
413 cells based on 2-dimensional fits of *GPD1*::GFP and forward scatter data. The 2-dimensional fits  
414 distinguished different signaling slightly better than fitting *GPD1*::GFP only; adding side scatter to  
415 fit distributions in 3-dimensional space provided no additional resolution of cell types (see  
416 (<https://figshare.com/s/8147275b62eb8d4db6bf/>) for planar projections of each sample in 3  
417 dimensions). Machine learning was performed on each sample using the sklearn.mixture  
418 option in the Gaussian Mixture Model (GMM) algorithm of the Python scikit package  
419 (<http://scikit-learn.org/>). The number of Gaussians to be fit is a parameter that must be provided  
420 to the model. We used Bayesian information criteria (BIC) to determine that the data were well  
421 described by four distributions. The GMM algorithm identified parameters of the four most-likely  
422 Gaussian (defined by means and covariances) given the data for each sample. In samples  
423 containing obviously fewer than four distributions, the under-populated distributions were  
424 assigned a correspondingly low frequency of cells (see Figures S1, S3 and associated links to  
425 complete data sets given above).

426

## 427 **Clustering**

428 To group, and ultimately rank, the strains according to their osmotic stress signaling responses  
429 to 2.5 M KCl during post-diauxic growth we used hierarchical clustering with Wards method in the  
430 fastcluster Python implementation (<http://www.jstatsoft.org/v53/i09/>)<sup>34</sup>. First we created state  
431 vectors of each strains behavior. Cell distributions were binned onto a 100 X 100 2-D grid  
432 according to their *GPD1*::GFP and forward scatter data, smoothed with Python scipy  
433 ndimage.filters.gaussian\_filter and normalized to define a linear 1000 element state vector for  
434 each sample (strain, time point). While 100 bins on each axis where sufficient to capture  
435 detailed distributions while allowing efficient computation, we found stronger clustering when  
436 performing the same analysis using the combined *GPD1*::GFP and forward scattering data. The  
437 osmotic stress response up to 168 hours was defined by the vectors for each of the 7 time  
438 points, successively appended to form a 7,000 element time-line vector representing the  
439 combined evolution of *GPD1*::GFP accumulation and forward scatter data.

440 The time-line vectors were used to compute a distance matrix between strains using  
441 the symmetric Kullback-Leibler divergence. As each strains and time point was replicated  
442 between 4 and 15 times, we controlled for variation in sampling and clustering outcomes by  
443 randomly drawing samples for each strain and time point with equal probability. Clustering was  
444 repeated for a total of 17000 permutations requiring 43 hours of computation time on a 3.7 GHz  
445 Intel 7 iMac. This was sufficient to achieve stable Monte-Carlo statistics. Computational sorting  
446 of time-series distributions resolved 6 clades differentiated for rates of GFP accumulation,  
447 adaptation and survival.

448

#### 449 **Bet hedging model**

450 Annotated code for our model of bet hedging with heritable probability binary cautious versus  
451 reckless bet hedging is publicly available (<https://figshare.com/s/2c03544aef0c40cc86c2/>). In  
452 brief, the bet hedging ‘strategy’  $P$  was defined as the heritable probability of cautious cells for  $0 \leq$   
453  $P \leq 1$ . Relative fitness was measured for representative strategies (0, 0.1, 0.2, ... 1.0) after 10  
454 generations in each environment. Nine possible 2-state environmental shifts between three  
455 general osmotic stress environments were considered: permissive (E0; all cells grow equally  
456 well), restrictive (E1; reckless cells divide, cautious cells survive without dividing), and killing (E2;  
457 reckless cells die, cautious cells survive without cell division). For simplicity, the natural attrition  
458 of older cells (death and disappearance) and rates of cell division were assumed to be equal for  
459 all cell types. Results were independent of the number of generations in the first environment  
460 except as shown when E1 was the first environment.

461

462 **References**

- 463
- 464 1. Kirschner, M. & Gerhart, J. Evolvability. *Proc. Natl. Acad. Sci. U. S. A.* **95**, 8420–8427 (1998).
  - 465 2. West-Eberhard, M. J. *Developmental plasticity and evolution.* *Nature* **424**, (2003).
  - 466 3. Rutherford, S. L. From genotype to phenotype: buffering mechanisms and the storage of genetic  
467 information. *Bioessays* **22**, 1095–105 (2000).
  - 468 4. Hohmann, S. Osmotic Stress Signaling and Osmoadaptation in Yeasts. *Microbiol. Mol. Biol. Rev.*  
469 **66**, 300–372 (2002).
  - 470 5. Hohmann, S., Krantz, M. & Nordlander, B. *Yeast Osmoregulation. Methods Enzymol.* **428**, (Elsevier  
471 Masson SAS, 2007).
  - 472 6. Saito, H. & Posas, F. Response to hyperosmotic stress. *Genetics* **192**, 289–318 (2012).
  - 473 7. Clotet, J. & Posas, F. *Control of Cell Cycle in Response to Osmostress: Lessons from Yeast.*  
474 *Methods Enzymol.* **428**, (Elsevier Masson SAS, 2007).
  - 475 8. Nadal, E. de, Alepuz, P. & Posas, F. Dealing with osmostress through MAP kinase activation.  
476 *EMBO Rep.* **3**, 735–40 (2002).
  - 477 9. Babazadeh, R., Furukawa, T., Hohmann, S. & Furukawa, K. Rewiring yeast osmostress signalling  
478 through the MAPK network reveals essential and non-essential roles of Hog1 in osmoadaptation.  
479 *Sci. Rep.* **4**, 4697 (2014).
  - 480 10. Ratcliff, W. C., Hawthorne, P. & Libby, E. Courting disaster: How diversification rate affects fitness  
481 under risk. *Evolution* 1–10 (2014). doi:10.1111/evo.12568
  - 482 11. Remize, F., Barnavon, L. & Dequin, S. Glycerol export and glycerol-3-phosphate dehydrogenase,  
483 but not glycerol phosphatase, are rate limiting for glycerol production in *Saccharomyces cerevisiae*.  
484 *Metab. Eng.* **3**, 301–312 (2001).
  - 485 12. Bennett, M. R. *et al.* Metabolic gene regulation in a dynamically changing environment. *Nature* **454**,  
486 1119–1122 (2008).
  - 487 13. Miermont, A. *et al.* Severe osmotic compression triggers a slowdown of intracellular signaling,  
488 which can be explained by molecular crowding. *Proc. Natl. Acad. Sci. U. S. A.* **110**, 5725–30  
489 (2013).
  - 490 14. Lee, Y. J., Jeschke, G. R., Roelants, F. M., Thorner, J. & Turk, B. E. Reciprocal Phosphorylation of  
491 Yeast Glycerol-3-Phosphate Dehydrogenases in Adaptation to Distinct Types of Stress. *Mol. Cell.*  
492 *Biol.* **32**, 4705–4717 (2012).
  - 493 15. Jacoby, T. *et al.* Two Protein-tyrosine Phosphatases Inactivate the Osmotic Stress Response  
494 Pathway in Yeast by Targeting the Mitogen-activated Protein Kinase, Hog1. *J. Biol. Chem.* **272**,  
495 17749–17755 (1997).
  - 496 16. Wurgler-Murphy, S. M., Maeda, T., Witten, E. a & Saito, H. Regulation of the *Saccharomyces*  
497 *cerevisiae* HOG1 mitogen-activated protein kinase by the PTP2 and PTP3 protein tyrosine  
498 phosphatases. *Mol. Cell. Biol.* **17**, 1289–1297 (1997).
  - 499 17. Muzzey, D., Gómez-Urbe, C. a., Mettetal, J. T. & van Oudenaarden, A. A Systems-Level Analysis  
500 of Perfect Adaptation in Yeast Osmoregulation. *Cell* **138**, 160–171 (2009).
  - 501 18. Boy-Marcotte, E., Perrot, M., Bussereau, F., Boucherie, H. & Jacquet, M. Msn2p and Msn4p control  
502 a large number of genes induced at the diauxic transition which are repressed by cyclic AMP in  
503 *Saccharomyces cerevisiae*. *J. Bacteriol.* **180**, 1044–52 (1998).
  - 504 19. Yi, T. M., Huang, Y., Simon, M. I. & Doyle, J. Robust perfect adaptation in bacterial chemotaxis  
505 through integral feedback control. *Proc. Natl. Acad. Sci. U. S. A.* **97**, 4649–4653 (2000).
  - 506 20. Galdieri, L., Mehrotra, S., Yu, S. & Vancura, A. Transcriptional Regulation in Yeast during Diauxic  
507 Shift and Stationary Phase. *Omi. A J. Integr. Biol.* **14**, 629–638 (2010).
  - 508 21. Gray, J. V *et al.* ‘Sleeping beauty’: quiescence in *Saccharomyces cerevisiae*. *Microbiol. Mol. Biol.*  
509 *Rev.* **68**, 187–206 (2004).
  - 510 22. Philippi, T. & Seger, J. Hedging one’s evolutionary bets, revisited. *Trends Ecol. Evol. (Personal Ed.)*  
511 **4**, 41–44 (1989).
  - 512 23. Simons, A. M. Modes of response to environmental change and the elusive empirical evidence for  
513 bet hedging. *Proc. Biol. Sci.* **278**, 1601–1609 (2011).
  - 514 24. King, O. D. & Masel, J. The evolution of bet-hedging adaptations to rare scenarios. *Theor. Popul.*  
515 *Biol.* **72**, 560–575 (2007).
  - 516 25. Meyers, L. A. & Bull, J. J. Fighting change with change: Adaptive variation in an uncertain world.

- 517 *Trends Ecol. Evol.* **17**, 551–557 (2002).
- 518 26. Levy, S. F., Ziv, N. & Siegal, M. L. Bet hedging in yeast by heterogeneous, age-correlated  
519 expression of a stress protectant. *PLoS Biol.* **10**, (2012).
- 520 27. De Jong, I. G., Haccou, P. & Kuipers, O. P. Bet hedging or not? A guide to proper classification of  
521 microbial survival strategies. *BioEssays* **33**, 215–223 (2011).
- 522 28. Ratcliff, W. C. & Denison, R. F. Individual-Level Bet Hedging in the Bacterium *Sinorhizobium*  
523 *melliloti*. *Curr. Biol.* **20**, 1740–1744 (2010).
- 524 29. Rutherford, S. L. Between genotype and phenotype: protein chaperones and evolvability. *Nat. Rev.*  
525 *Genet.* **4**, 263–74 (2003).
- 526 30. Giaever, G. *et al.* Functional profiling of the *Saccharomyces cerevisiae* genome. *Nature* **418**, 387–  
527 391 (2002).
- 528 31. Shoemaker, D. D., Lashkari, D. a, Morris, D., Mittmann, M. & Davis, R. W. Quantitative phenotypic  
529 analysis of yeast deletion mutants using a highly parallel molecular bar-coding strategy. *Nat. Genet.*  
530 **14**, 450–456 (1996).
- 531 32. Wach, A., Brachat, A., Pöhlmann, R. & Philippsen, P. New heterologous modules for classical or  
532 PCR-based gene disruptions in *Saccharomyces cerevisiae*. *Yeast* **10**, 1793–1808 (1994).
- 533 33. Gietz, R. D. & Woods, R. a. Transformation of yeast by lithium acetate/single-stranded carrier  
534 DNA/polyethylene glycol method. *Methods Enzymol.* **350**, 87–96 (2002).
- 535 34. Müllner, D. fastcluster : Fast Hierarchical , Agglomerative Clustering Routines for R and Python. *J.*  
536 *Stat. Softw.* **53**, 1–18 (2013).
- 537 35. Mortimer, R. K. & Johnston, J. R. Genealogy of principal strains of the yeast genetic stock center.  
538 *Genetics* **113**, 35–43 (1986).
- 539 36. Brachmann, C. B. *et al.* Designer deletion strains derived from *Saccharomyces cerevisiae* S288C:  
540 A useful set of strains and plasmids for PCR-mediated gene disruption and other applications.  
541 *Yeast* **14**, 115–132 (1998).
- 542
- 543



544 **Supplementary information and data deposition**

545 Flow cytometry database

546 (<https://figshare.com/s/52ef966b16cba7f41d7f/>)

547 Python script for bet hedging model

548 (<https://figshare.com/s/2c03544aef0c40cc86c2/>)

549 Figure S1 complete data

550 (<https://figshare.com/s/8b709fd16cccbabc2a5a/>)

551 Figure S3 complete data

552 (<https://figshare.com/s/8147275b62eb8d4db6bf/>)

553

554

555 **Acknowledgements**

556 The wild strain collection was made and validated in the Rutherford lab over 3 summers with the  
557 help of talented teams of undergraduate lab assistants. We thank Wyming Lee Pang and Jeff  
558 Hasty for help with microfluidics and Stéphane Douady and Pierre-Yves Bourguignon for  
559 discussions and advice on scaling and clustering. This research was supported by a Scholar  
560 Award from the Damon Runyon Cancer Research Foundation (SR) and the Lady Tata  
561 Foundation (YH).

562

563 **Contributions**

564 SR designed experiments, wild haploid library construction and workflow, data analysis and  
565 writing. YH designed and performed experiments, data analysis, and writing. SB database  
566 construction, data analysis, statistical design and programming. WLP microfluidics design and  
567 training.

568

569 **Author information**

570 Current address for YH is Center for Experimental Animals, Tokyo Medical and Dental  
571 University, 1-5-45 Yushima, Bunkyo-ku, Tokyo 113-8510, Japan; WLP is UCSD Health  
572 Sciences, 9500 Gilman Drive, Dept 0012, La Jolla, CA 92093-0012.

573

574 None of the authors have competing interests.

575

576

577 **Tables**

578 **Table 1. Strains and aliases used in this study.** See Table S1 for details about each of the 49  
 579 wild haploid strain derivatives (WHXXX). For brevity, figures are labeled with the wild parent  
 580 strain number (WXXX; see Table S1 for details).

581

| Strain        | Genotype                                                                                                                         | Source                                                                                                                                                                                                                                                                                   |
|---------------|----------------------------------------------------------------------------------------------------------------------------------|------------------------------------------------------------------------------------------------------------------------------------------------------------------------------------------------------------------------------------------------------------------------------------------|
| WHXXX         | <i>MATa ura3Δ0 hoΔ::barcode::KanMX4</i>                                                                                          | Haploid <i>MATa</i> isolates of wild strains. This study; see Table S1 for details.                                                                                                                                                                                                      |
| BY41          | <i>MATa his3D1 leu2Δ0 met15Δ0 ura3Δ0 flo8-1 hoΔ::barcode::KanMX4</i>                                                             | Barcoded, <i>MATa</i> derivative of BY4742 used as a control genotype for the laboratory strain background. This study.                                                                                                                                                                  |
| BY4742 (BY01) | <i>MATalpha his3D1 leu2Δ0 lys2Δ0 ura3Δ0 flo8-1</i>                                                                               | <i>MATalpha</i> laboratory strain. BY4741 and BY4742 backgrounds derive from a wild diploid isolated in Merced, California in 1938 on figs (EM93 <sup>35</sup> ; S228C <sup>36</sup> ). They are distinguished primarily by the many generations it has been under laboratory selection. |
| G01           | <i>MATalpha his3D1 leu2Δ0 lys2Δ0 ura3Δ0 flo8-1 gpd1D::GFP::URA3</i>                                                              | Used for monitoring GPD1. BY4742 background; this study.                                                                                                                                                                                                                                 |
| WXXX.BY16     | <i>MATa/MATalpha LYS2/lys2Δ0 ura3Δ0/URA3 FLO8/flo8-1 hoΔ::barcode::KanMX4/ho</i>                                                 | Controls. A set of 49 wild/lab plus 1 BY41.BY16 control for effect of marker gene deletions. This study; see Table S1 for details.                                                                                                                                                       |
| WXXX.G01      | <i>MATa/MATalpha HIS3/his3D1 LEU2/leu2Δ0 LYS2/lys2Δ0 ura3Δ0/ura3Δ0 FLO8/flo8-1 hoΔ::barcode::KanMX4/ho GPD1/gpd1D::GFP::URA3</i> | Synthetic population of wild/lab diploids for GPD1 quantification. This study; see Table S1 for details.                                                                                                                                                                                 |

582

583 **Table 2. Negative feedback between rates of change in mean *GPD1::GFP* accumulation**  
 584 **and viability among strains.** To control for potential deviations from normality, parametric  
 585 (Pearson's) and non-parametric (Spearman's) pairwise correlations between rates of change in  
 586 *GPD1::GFP* accumulation and viability within (upper 3 rows) and between 2 hours time intervals  
 587 (below). Changes occurring in earlier intervals, potentially causal for later changes, are listed  
 588 first. As in Figure 1 all 50 strains were tested at 0, 2, and 4 hours and 18 strains were tested at  
 589 6 hours (mean values represent a minimum of 3 replicates per strain). Significant comparisons  
 590 are indicated in bold.  
 591

| N  | Variable           | Interval (hrs) | Variable           | Interval (hrs) | Pearson's r | Spearman's r | Prob> r          |                  |
|----|--------------------|----------------|--------------------|----------------|-------------|--------------|------------------|------------------|
|    |                    |                |                    |                |             |              | Pearson's        | Spearman's       |
| 50 | $\Delta GPD1::GFP$ | 0 – 2          | $\Delta viability$ | 0 – 2          | 0.8235      | 0.7725       | <b>&lt;.0001</b> | <b>&lt;.0001</b> |
| 50 | $\Delta GPD1::GFP$ | 2 – 4          | $\Delta viability$ | 2 – 4          | 0.7739      | 0.7217       | <b>&lt;.0001</b> | <b>&lt;.0001</b> |
| 18 | $\Delta GPD1::GFP$ | 4 – 6          | $\Delta viability$ | 4 – 6          | -0.2354     | -0.1992      | 0.3470           | 0.4282           |
| 50 | $\Delta viability$ | 0 – 2          | $\Delta GPD1::GFP$ | 2 – 4          | -0.7867     | -0.7411      | <b>&lt;.0001</b> | <b>&lt;.0001</b> |
| 50 | $\Delta viability$ | 0 – 2          | $\Delta viability$ | 2 – 4          | -0.9670     | -0.9503      | <b>&lt;.0001</b> | <b>&lt;.0001</b> |
| 50 | $\Delta GPD1::GFP$ | 0 – 2          | $\Delta GPD1::GFP$ | 2 – 4          | -0.7685     | -0.7697      | <b>&lt;.0001</b> | <b>&lt;.0001</b> |
| 50 | $\Delta GPD1::GFP$ | 0 – 2          | $\Delta viability$ | 2 – 4          | -0.8082     | -0.7696      | <b>&lt;.0001</b> | <b>&lt;.0001</b> |
| 18 | $\Delta viability$ | 0 – 2          | $\Delta viability$ | 4 – 6          | -0.1407     | -0.2178      | 0.5777           | 0.3854           |
| 18 | $\Delta viability$ | 0 – 2          | $\Delta GPD1::GFP$ | 4 – 6          | -0.3704     | -0.2549      | 0.1303           | 0.3073           |
| 18 | $\Delta GPD1::GFP$ | 0 – 2          | $\Delta viability$ | 4 – 6          | -0.0456     | -0.0464      | 0.8573           | 0.8548           |
| 18 | $\Delta GPD1::GFP$ | 0 – 2          | $\Delta GPD1::GFP$ | 4 – 6          | -0.4319     | -0.4572      | 0.0735           | 0.0565           |
| 18 | $\Delta viability$ | 2 – 4          | $\Delta viability$ | 4 – 6          | -0.0100     | 0.0733       | 0.9685           | 0.7726           |
| 18 | $\Delta viability$ | 2 – 4          | $\Delta GPD1::GFP$ | 4 – 6          | 0.4316      | 0.3333       | 0.0737           | 0.1765           |
| 18 | $\Delta GPD1::GFP$ | 2 – 4          | $\Delta viability$ | 4 – 6          | 0.1400      | 0.1207       | 0.5796           | 0.6332           |
| 18 | $\Delta GPD1::GFP$ | 2 – 4          | $\Delta GPD1::GFP$ | 4 – 6          | 0.3731      | 0.3602       | 0.1273           | 0.1421           |

592

593

594 **Table 3. Growth of post-diauxic cells at unprecedented limits of adaptation.** Shown are  
595 concentrations of agar media on which post-diauxic strains could grow and form colonies.  
596

| [KCl] M | Wild/lab ( <i>GPD1</i> ) diploids*                                                                               |
|---------|------------------------------------------------------------------------------------------------------------------|
| 2.0     | W455                                                                                                             |
| 2.6     | W027, W035, W167, W202, W203, W242, W285, W454                                                                   |
| 2.7     | W033, W041, W042, W134, W136, W150, W166, W178, W195, W215, W217, W219, W235, W248, W282, W291, W292, W294, BC41 |
| 2.8     | W037, W044, W050, W153, W157, W163, W164, W179, W189, W206, W238, W244, W245, W249, W255, W276, W301, W340       |
| 2.9     | W173, W211, W343                                                                                                 |

597

598

599 **Table 4. Osmotic stress signaling behavior (rank) predicted early and late viability of**  
 600 **post-diauxic cultures in osmotic stress.** Least squares predictions of early and late viability by  
 601 linear and 2<sup>nd</sup> order quadratic fits of fluorescence pre-accumulated into the G3 Gaussian at time  
 602 0 (G3\_0) and ranked signaling behavior of 50 strains. The Bonferroni cutoff at the 0.05 level,  
 603 based on 4 tests per data set, was 0.0125. Significant fits with lowest root mean squared errors  
 604 and highest fraction of variation explained ( $R^2$ ) shown in bold, predicted values for optimum (x)  
 605 and value at optimum (y) for non-significant fits are marked NS.  
 606

|                              | G <sub>3</sub> fluorescence (AU)<br>at time 0 |          | Signaling (rank) |         |
|------------------------------|-----------------------------------------------|----------|------------------|---------|
|                              | quadratic                                     | linear   | quadratic        | linear  |
| <b>0 hours, 0M KCl</b>       |                                               |          |                  |         |
| probability > F              | <b>0.0006</b>                                 | 0.0016   | 0.9629           | 0.8454  |
| R_square                     | <b>0.2715</b>                                 | 0.1891   | 0.0016           | 0.0008  |
| root_mean_square_error       | <b>1.3935</b>                                 | 1.4548   | 1.6313           | 1.6149  |
| max_viability at optimum (%) | <b>98.8</b>                                   |          | NS 98.2          |         |
| optimum AU or rank           | <b>2626.6</b>                                 |          | NS 31.9          |         |
| <b>20 hours, 2.5M KCl</b>    |                                               |          |                  |         |
| probability > F              | <b>&lt; 0.0001</b>                            | < 0.0001 | <b>0.0055</b>    | 0.6023  |
| R_square                     | <b>0.4286</b>                                 | 0.3138   | <b>0.1987</b>    | 0.0057  |
| root_mean_square_error       | <b>7.0949</b>                                 | 7.6940   | <b>8.4022</b>    | 9.2615  |
| max_viability at optimum (%) | <b>86.7</b>                                   |          | <b>86.3</b>      |         |
| optimum AU or rank           | <b>2662.5</b>                                 |          | <b>24.4</b>      |         |
| <b>48 hours, 2.5M KCl</b>    |                                               |          |                  |         |
| probability > F              | <b>&lt; 0.0001</b>                            | 0.0003   | <b>0.0013</b>    | 0.9159  |
| R_square                     | <b>0.3148</b>                                 | 0.2371   | <b>0.2464</b>    | 0.0002  |
| root_mean_square_error       | <b>7.6281</b>                                 | 8.1323   | <b>8.1679</b>    | 9.3096  |
| max_viability at optimum (%) | <b>82.2</b>                                   |          | <b>82.9</b>      |         |
| optimum AU or rank           | <b>2622.3</b>                                 |          | <b>25.7</b>      |         |
| <b>72 hours, 2.5M KCl</b>    |                                               |          |                  |         |
| probability > F              | <b>0.0010</b>                                 | 0.0033   | <b>0.0062</b>    | 0.8464  |
| R_square                     | <b>0.2556</b>                                 | 0.1660   | <b>0.1943</b>    | 0.0008  |
| root_mean_square_error       | <b>9.9877</b>                                 | 10.4608  | <b>10.3903</b>   | 11.4501 |
| max_viability at optimum (%) | <b>73.5</b>                                   |          | <b>74.3</b>      |         |
| optimum AU or rank           | <b>2586.8</b>                                 |          | <b>25.1</b>      |         |
| <b>96 hours, 2.5M KCl</b>    |                                               |          |                  |         |
| probability > F              | <b>0.0060</b>                                 | 0.0018   | <b>0.0065</b>    | 0.0954  |
| R_square                     | <b>0.1956</b>                                 | 0.1862   | <b>0.1927</b>    | 0.0569  |
| root_mean_square_error       | <b>8.4186</b>                                 | 8.3789   | <b>8.4338</b>    | 9.0201  |
| max_viability at optimum (%) | <b>71.7</b>                                   |          | <b>71.0</b>      |         |
| optimum AU or rank           | <b>3389.8</b>                                 |          | <b>21.3</b>      |         |
| <b>120 hours, 2.5M KCl</b>   |                                               |          |                  |         |
| probability > F              | 0.0791                                        | 0.0413   | <b>0.0004</b>    | 0.0037  |
| R_square                     | 0.1023                                        | 0.0839   | <b>0.2859</b>    | 0.1625  |
| root_mean_square_error       | 8.5666                                        | 8.5636   | <b>7.6405</b>    | 8.1881  |
| max_viability at optimum (%) | NS 67.7                                       |          | <b>74.7</b>      |         |

|                               |           |         |                    |          |
|-------------------------------|-----------|---------|--------------------|----------|
| optimum AU or rank            | NS 1679   |         | <b>18.1</b>        |          |
| <b>144 hours, 2.5M KCI</b>    |           |         |                    |          |
| probability > F               | 0.3473    | 0.1675  | <b>0.0047</b>      | 0.0501   |
| R_square                      | 0.0440    | 0.0393  | <b>0.2038</b>      | 0.0776   |
| root_mean_square_error        | 9.6837    | 9.6059  | <b>8.8377</b>      | 9.4123   |
| max_viability at optimum (%)  | NS 61.9   |         | <b>68.3</b>        |          |
| optimum AU or rank            | NS 1481.3 |         | <b>20.4</b>        |          |
| <b>168 hours, 2.5M KCI</b>    |           |         |                    |          |
| probability > F               | 0.1785    | 0.3433  | <b>&lt;0.0001</b>  | < 0.0001 |
| R_square                      | 0.0707    | 0.0187  | <b>0.5733</b>      | 0.4911   |
| root_mean_square_error        | 12.3795   | 12.5879 | <b>8.3885</b>      | 9.0652   |
| max_viability at optimum (%)  | NS 56.2   |         | <b>68.4</b>        |          |
| optimum AU or rank            | NS 2077   |         | <b>9.7</b>         |          |
| <b>24 hours, 3M KCI</b>       |           |         |                    |          |
| probability > F               | 0.0107    | 0.0292  | <b>&lt; 0.0001</b> | < 0.0001 |
| R_square                      | 0.1757    | 0.0952  | <b>0.5254</b>      | 0.2980   |
| root_mean_square_error        | 11.8963   | 12.3332 | <b>9.0267</b>      | 10.8635  |
| max_viability at optimum (%)  | 71.7      |         | <b>65.0</b>        |          |
| optimum AU or rank            | 2029.2    |         | <b>18.1</b>        |          |
| <b>48 hours, 3M KCI</b>       |           |         |                    |          |
| probability > F               | 0.0294    | 0.0140  | <b>&lt; 0.0001</b> | 0.0003   |
| R_square                      | 0.1394    | 0.1193  | <b>0.5382</b>      | 0.2402   |
| root_mean_square_error        | 12.8903   | 12.9029 | <b>9.4420</b>      | 11.9849  |
| max_viability at optimum (%)  | NS 57.1   |         | <b>62.3</b>        |          |
| optimum AU or rank            | NS 2867.3 |         | <b>19.7</b>        |          |
| <b>72 hours, 3M KCI</b>       |           |         |                    |          |
| probability > F               | 0.0519    | 0.0395  | <b>&lt; 0.0001</b> | 0.0002   |
| R_square                      | 0.1183    | 0.0853  | <b>0.5459</b>      | 0.2460   |
| root_mean_square_error        | 12.4241   | 12.5218 | <b>8.9158</b>      | 11.3687  |
| max_viability at optimum (%)  | NS 51.4   |         | <b>56.9</b>        |          |
| optimum AU or rank            | NS 2651   |         | <b>19.7</b>        |          |
| <b>Adaptation limit</b>       |           |         |                    |          |
| probability > F               | 0.5435    | 0.2699  | <b>0.0002</b>      | 0.0086   |
| R_square                      | 0.0262    | 0.0258  | <b>0.3099</b>      | 0.1379   |
| root_mean_square_error        | 0.1344    | 0.1330  | <b>0.1132</b>      | 0.1251   |
| max_concentration optimum (M) | NS 2.8    |         | <b>2.8</b>         |          |
| optimum AU or rank            | NS -95.6  |         | <b>31.2</b>        |          |

607

608

609 **Table S1. Haploid derivatives of wild strains.** The source for all wild strains in this study  
 610 was the strain collection of the Royal Netherlands Academy of Arts and Sciences over the past  
 611 100 years (Table 1 and Table S1). This resource has been deposited at the Yeast Genetic  
 612 Resources Lab of the National BioResource Project in Osaka, Japan.

613

| Alias | MAT | Genotype                                   | Comments                                                                                                                                                                                                                        |
|-------|-----|--------------------------------------------|---------------------------------------------------------------------------------------------------------------------------------------------------------------------------------------------------------------------------------|
| WH027 | a   | <i>MATa</i> ura3Δ0<br>hoΔ::barcode::KanMX4 | Original CBS #: CBS 459; isolated in 1938 in Castellina, Italy from grape must; barcode #29(Uptag sequence: GGCCCGCACACAATTAGGAA, Downtag sequence: GCGCCGCATTAATAACTAACTA)                                                     |
| WH030 | a   | <i>MATa</i> ura3Δ0<br>hoΔ::barcode::KanMX4 | Original CBS #: CBS 1508; isolated in 1927 from starter for sorghum brandy; YH note: mating defective, hard to make wild/lab diploids; barcode #16(Uptag sequence: GTCCGAACATCAACACGTA, Downtag sequence: GCGCAGGAGAAACCTCTTAA) |
| WH033 | a   | <i>MATa</i> ura3Δ0<br>hoΔ::barcode::KanMX4 | Original CBS #: CBS 405; isolated in 1925 in West Africa from catabo for billi wine, from <i>Osbeckia grandiflora</i> ; barcode #187(Uptag sequence: CCGTGTACTGAATTACGATC, Downtag sequence: CCATCTTTGGTAATGTGAGG)              |
| WH035 | a   | <i>MATa</i> ura3Δ0<br>hoΔ::barcode::KanMX4 | Original CBS #: CBS 5822; isolated in 1967 from malt wine; barcode #30(Uptag sequence: GGTCTATGCAAACACCCGAA, Downtag sequence: GCCGTCTTGACAACCTTATA)                                                                            |
| WH037 | a   | <i>MATa</i> ura3Δ0<br>hoΔ::barcode::KanMX4 | Original CBS #: CBS 1395; isolated in 1922 from an unknown source; barcode #235(Uptag sequence: GGCTAAGGGACAACACCTCA, Downtag sequence: GCCCGGCACATAGAAGTAAC)                                                                   |
| WH041 | a   | <i>MATa</i> ura3Δ0<br>hoΔ::barcode::KanMX4 | Original CBS #: CBS 5635; isolated in 1958 in South Africa from grape must; barcode #2(Uptag sequence: CCATGATGTAAACGATCCGA, Downtag sequence: TATATGGCAGCAGATCGCCG)                                                            |
| WH042 | a   | <i>MATa</i> ura3Δ0<br>hoΔ::barcode::KanMX4 | Original CBS #: CBS 3081; isolated in 1958 in Spain from alpechin; barcode #12(Uptag sequence: GTGCGAACCAACGTACTACA, Downtag sequence: GCAGGAACACCACAGGGTTA)                                                                    |
| WH044 | a   | <i>MATa</i> ura3Δ0<br>hoΔ::barcode::KanMX4 | Original CBS #: CBS 422; isolated in 1926 in Odessa, Ukraine from beer; barcode #135(Uptag sequence: CCCGCGATTGTAATGAATAG, Downtag sequence: CATACTACGTGGGACAGTTG)                                                              |
| WH050 | a   | <i>MATa</i> ura3Δ0<br>hoΔ::barcode::KanMX4 | Original CBS #: CBS 5112; isolated in 1962 in Spain from grape must; barcode #49(Uptag sequence: CTTACTGATAGCGTAGAGGT, Downtag sequence: GTGGTCTGCAAACCCAACAA)                                                                  |
| WH134 | a   | <i>MATa</i> ura3Δ0<br>hoΔ::barcode::KanMX4 | Original CBS #: CBS 2964; isolated in 1947 in Copenhagen, Denmark from distiller's rum yeast; barcode #18(Uptag sequence: GCCCTGATAACAAGGTGTAA, Downtag sequence: GCGCCTATTACACAAACGTA)                                         |

|       |   |                                            |                                                                                                                                                                                          |
|-------|---|--------------------------------------------|------------------------------------------------------------------------------------------------------------------------------------------------------------------------------------------|
| WH136 | a | <i>MATa</i> ura3Δ0<br>hoΔ::barcode::KanMX4 | Original CBS #: CBS 2811; isolated in 1957 from wine; wine yeast; barcode #20(Uptag sequence: GTGAGCGAAACACCGCGTAA, Downtag sequence: GGTAATACGCAACTCCTCTA)                              |
| WH150 | a | <i>MATa</i> ura3Δ0<br>hoΔ::barcode::KanMX4 | Original CBS #: CBS 2962; isolated in 1947 in Copenhagen, Denmark from distiller's rum; barcode #15(Uptag sequence: GCCGTAGCCACAAGAGTTAA, Downtag sequence: GCGGCCACTTACACAAATTA)        |
| WH153 | a | <i>MATa</i> ura3Δ0<br>hoΔ::barcode::KanMX4 | Original CBS #: CBS 6458; isolated in 1972; barcode #37(Uptag sequence: GGGACCGCCAAAGCTATCAA, Downtag sequence: GTGAACAATAACGGCCTTGA)                                                    |
| WH157 | a | <i>MATa</i> ura3Δ0<br>hoΔ::barcode::KanMX4 | Original CBS #: CBS 6506; isolated in 1973 in UK brewery; killer yeast; barcode #53(Uptag sequence: CTGAGCGTAGGATATTCCGT, Downtag sequence: GCCGGTCGCAAACCTCATAAA)                       |
| WH163 | a | <i>MATa</i> ura3Δ0<br>hoΔ::barcode::KanMX4 | Original CBS #: CBS 6914; isolated in 1977 in Spain from white wine; barcode #51(Uptag sequence: CTACGTGCGCTCATAGTCGT, Downtag sequence: GCTCTCGGCCAAGGAAACAA)                           |
| WH164 | a | <i>MATa</i> ura3Δ0<br>hoΔ::barcode::KanMX4 | Original CBS #: CBS 6978; isolated in 1984 from wine; wine yeast; barcode #59(Uptag sequence: CACTCGGATTCAGTTCTAGT, Downtag sequence: GGCCTTGCCAAACAGTCAAA)                              |
| WH166 | a | <i>MATa</i> ura3Δ0<br>hoΔ::barcode::KanMX4 | Original CBS #: CBS 7072; isolated in 1980 from distillate; barcode #62(Uptag sequence: CCTAGTTCGAGATTGCGAGT, Downtag sequence: GTGGTCGCCCAAGCAACAAA)                                    |
| WH167 | a | <i>MATa</i> ura3Δ0<br>hoΔ::barcode::KanMX4 | Original CBS #: CBS 7173; isolated in 1985 from catabo for billi wine; wine yeast; barcode #43(Uptag sequence: CAGTATGCTAGATTCCGGGT, Downtag sequence: GTCCTCGCAAGAAAGGCCAA)             |
| WH173 | a | <i>MATa</i> ura3Δ0<br>hoΔ::barcode::KanMX4 | Original CBS #: CBS 8615; isolated in 1998 in Italy from grape must; dry yeast for wine making; barcode #61(Uptag sequence: CCTGTAGTACGAGTATGAGT, Downtag sequence: GGTCTGCCCAAGTCACAAA) |
| WH178 | a | <i>MATa</i> ura3Δ0<br>hoΔ::barcode::KanMX4 | Original CBS #: CBS 1192; isolated in 1928 from wine; wine yeast; barcode #155(Uptag sequence: CGCACACGATTAAGGTCCAG, Downtag sequence: CACTGTTGGTAAGGTCTATG)                             |
| WH179 | a | <i>MATa</i> ura3Δ0<br>hoΔ::barcode::KanMX4 | Original CBS #: CBS 1193; isolated in 1928 from wine; wine yeast; barcode #70(Uptag sequence: CAATAGGGTGTGACAGTTCT, Downtag sequence: CTACTIONCGCTGAGCTGGTT)                             |
| WH189 | a | <i>MATa</i> ura3Δ0<br>hoΔ::barcode::KanMX4 | Original CBS #: CBS 1241; isolated in 1930 from an unknown source ; barcode #212(Uptag sequence: CCACTTAGTTCAATAGGCGC, Downtag sequence: CCGAGTATTACATTCTCACG)                           |



|       |   |                                            |                                                                                                                                                                                                                                                                                                             |
|-------|---|--------------------------------------------|-------------------------------------------------------------------------------------------------------------------------------------------------------------------------------------------------------------------------------------------------------------------------------------------------------------|
| WH195 | a | <i>MATa</i> ura3Δ0<br>hoΔ::barcode::KanMX4 | Original CBS #: CBS 1256; isolated in 1937 from port wine; barcode #123(Uptag sequence: CGTGGAGCAGTTCGTATAAT, Downtag sequence: CTCGACGCTGGACGTTATGT)                                                                                                                                                       |
| WH202 | a | <i>MATa</i> ura3Δ0<br>hoΔ::barcode::KanMX4 | Original CBS #: CBS 7372; isolated in 1988; killer yeast, K2Rd (Young & Yagiu), K2R2 (Wickner); barcode #119(Uptag sequence: CAACGTAGAGTGAGGTACAT, Downtag sequence: CACTTAGCTTAGACTCGTGT)                                                                                                                  |
| WH203 | a | <i>MATa</i> ura3Δ0<br>hoΔ::barcode::KanMX4 | Original CBS #: CBS 7438; isolated in 1989 from wine; wine yeast; barcode #65(Uptag sequence: CTTTCGGACGTATGTGCAGT, Downtag sequence: CCTTGATGATAGAGGGCTTT)                                                                                                                                                 |
| WH206 | a | <i>MATa</i> ura3Δ0<br>hoΔ::barcode::KanMX4 | Original CBS #: CBS 7833; isolated in 1994 in Missouri, USA from lung of a man with immune deficiency syndrome; virulent strain; barcode #82(Uptag sequence: CATACAAAGAGAGGTGCCT, Downtag sequence: CCCTTGCGATTGGTGCAGTT)                                                                                   |
| WH211 | a | <i>MATa</i> ura3Δ0<br>hoΔ::barcode::KanMX4 | Original CBS #: CBS 7838; isolated in 1994 in USA from patient; barcode #144(Uptag sequence: CGATACAAGTAAGTTGCGAG, Downtag sequence: CCTCTTACGAGATAGCGGTG)                                                                                                                                                  |
| WH215 | a | <i>MATa</i> ura3Δ0<br>hoΔ::barcode::KanMX4 | Original CBS #: CBS 7962; isolated in 1984 in Sao Paulo, Brazil from fermenting concentrated syrup from sugar cane; barcode #94(Uptag sequence: CCCGATTGAGGCATGGTTAT, Downtag sequence: CGCTTCGAGTATGGGATATT)                                                                                               |
| WH217 | a | <i>MATa</i> ura3Δ0<br>hoΔ::barcode::KanMX4 | Original CBS #: CBS 7964; isolated in 1995 in Sao Paulo, Brazil from fermenting concentrated syrup from sugar cane; barcode #92(Uptag sequence: CGCGGAGTATAGAGCTTTAT, Downtag sequence: CAATCGCTCGGAGGCGTATT)                                                                                               |
| WH219 | a | <i>MATa</i> ura3Δ0<br>hoΔ::barcode::KanMX4 | Original CBS #: CBS 439 ; isolated in 1933 in Lager Schartel, Germany from Silvaner grapes; barcode #93(Uptag sequence: CGACCCTGATGATCCTTTAT, Downtag sequence: CTACGGGCTCGATGCCTATT)                                                                                                                       |
| WH235 | a | <i>MATa</i> ura3Δ0<br>hoΔ::barcode::KanMX4 | Original CBS #: CBS 5952; isolated in 1968; barcode #102(Uptag sequence: GGCTACGATACATCTTCATC, Downtag sequence: CATTGTAAACCAGTTCGCTC)                                                                                                                                                                      |
| WH238 | a | <i>MATa</i> ura3Δ0<br>hoΔ::barcode::KanMX4 | Original CBS #: CBS 6223; isolated in 1969 in Chile from grape juice; radiation resistant; barcode #104(Uptag sequence: CTATGTGCGGTAAGACGTAT, Downtag sequence: CGGCGTAGATTGTTAGCATT)                                                                                                                       |
| WH242 | a | <i>MATa</i> ura3Δ0<br>hoΔ::barcode::KanMX4 | Original CBS #: CBS 6333; isolated in 1942 in Costa Rica from rotting banana; Strain name NRRL Y-1350 (synonymous designation; NRRL YB-210, NRRL-210, NRRL-B210; Mortimer and Johnston (1986), Genetics 113: 35); barcode #56(Uptag sequence: CCTGTAGATTGACGTGTAGT, Downtag sequence: GCCCTCGTGACAAATCGAAA) |

|       |   |                                            |                                                                                                                                                                                                                                                                                                        |
|-------|---|--------------------------------------------|--------------------------------------------------------------------------------------------------------------------------------------------------------------------------------------------------------------------------------------------------------------------------------------------------------|
| WH244 | a | <i>MATa</i> ura3Δ0<br>hoΔ::barcode::KanMX4 | Original CBS #: CBS 8266; isolated in 1996 from rotting fig; Strain name X2180, derived from S288C by self-diploidization (Mortimer and Johnston (1986), Genetics 113: 35). Did not survive freeze-drying.; barcode #122(Uptag sequence: CAGAGGGCACTGTTCTTAAT, Downtag sequence: CCCTGCTGTAGAGGTTATGT) |
| WH245 | a | <i>MATa</i> ura3Δ0<br>hoΔ::barcode::KanMX4 | Original CBS #: CBS 3000; isolated in 1956 in Pakistan from palm wine; wine yeast; barcode #138(Uptag sequence: CACATCGTTTAACTGAG, Downtag sequence: CTAGGAGGTTACAGTCATTG)                                                                                                                             |
| WH248 | a | <i>MATa</i> ura3Δ0<br>hoΔ::barcode::KanMX4 | Original CBS #: CBS 8049; isolated in 1981 from fish food; feed for fish and crustaceans; barcode #108(Uptag sequence: CGACCCGATGTAGTAGATAT, Downtag sequence: CCGCCGATGTGATATAATT)                                                                                                                    |
| WH249 | a | <i>MATa</i> ura3Δ0<br>hoΔ::barcode::KanMX4 | Original CBS #: CBS 6069; isolated in 1981; hybrid strain (Y55-2 x JJ101); barcode #87(Uptag sequence: CACTGTGACCGAGGGATACT, Downtag sequence: CGCGCTATTATACTCGACTT)                                                                                                                                   |
| WH255 | a | <i>MATa</i> ura3Δ0<br>hoΔ::barcode::KanMX4 | Original CBS #: CBS 3090; isolated in 1958 from white grape must; barcode #72(Uptag sequence: CACTGTGGACGATACGGTCT, Downtag sequence: CTGTACGTGCGATACTCGTT)                                                                                                                                            |
| WH276 | a | <i>MATa</i> ura3Δ0<br>hoΔ::barcode::KanMX4 | Original CBS #: CBS 1394; isolated in 1924 from pressed yeast; distillery yeast; barcode #176(Uptag sequence: CCACCGATGTAATTTGAGTC, Downtag sequence: CACTCTGCGTTAATGTTGGG)                                                                                                                            |
| WH282 | a | <i>MATa</i> ura3Δ0<br>hoΔ::barcode::KanMX4 | Original CBS #: CBS 1460; isolated in 1927 in Indonesia from fermenting fruit; barcode #115(Uptag sequence: CATACTTAGGGATCAGGGAT, Downtag sequence: CCTTGTCTGAGAGCCGTTGT)                                                                                                                              |
| WH285 | a | <i>MATa</i> ura3Δ0<br>hoΔ::barcode::KanMX4 | Original CBS #: CBS 1479; isolated in 1928 from wine; wine yeast; barcode #240(Uptag sequence: GCGGCCAATAGTAACTTCA, Downtag sequence: GCCGCCGTGATAAGAAACAC)                                                                                                                                            |
| WH291 | a | <i>MATa</i> ura3Δ0<br>hoΔ::barcode::KanMX4 | Original CBS #: CBS 1576; isolated in 1931 in Sulawesi, Indonesia from sap of Arenga palm; barcode #117(Uptag sequence: CCTGAGGACTTATTCACGAT, Downtag sequence: CATTGGATTAGACCGTGTGT)                                                                                                                  |
| WH292 | a | <i>MATa</i> ura3Δ0<br>hoΔ::barcode::KanMX4 | Original CBS #: CBS 1582; isolated in 1948 in Portugal from wine; barcode #118(Uptag sequence: CCGATTAGAGGTTGACAGAT, Downtag sequence: CACTGACTTCGAGGTCGTGT)                                                                                                                                           |
| WH294 | a | <i>MATa</i> ura3Δ0<br>hoΔ::barcode::KanMX4 | Original CBS #: CBS 1585; isolated in 1934 from sake-moto; sake yeast; barcode #180(Uptag sequence: CATTAAAGGCGCACGTTTATC, Downtag sequence: CTATCCTAGAGATTTGAGGG)                                                                                                                                     |
| WH301 | a | <i>MATa</i> ura3Δ0<br>hoΔ::barcode::KanMX4 | Original CBS #: CBS 1594; isolated in 1936 from juice of aren palm; barcode #182(Uptag sequence: CACGTTTGCGAATAGGTATC, Downtag sequence: CAGATACTATTAAGTGCCGG)                                                                                                                                         |

|                  |          |                                                                                                                         |                                                                                                                                                                                                                                                                                                                               |
|------------------|----------|-------------------------------------------------------------------------------------------------------------------------|-------------------------------------------------------------------------------------------------------------------------------------------------------------------------------------------------------------------------------------------------------------------------------------------------------------------------------|
| WH340            | <b>a</b> | <i>MATa</i> ura3 $\Delta$ 0<br>ho $\Delta$ ::barcode::KanMX4                                                            | Original CBS #: CBS 2805; isolated in 1954 from wine; wine yeast, particularly suitable for fruit wines; barcode #233(Uptag sequence: GCCGGGCTTAAATTGAATCA, Downtag sequence: GCTCCGACTGAAGAACTAAC)                                                                                                                           |
| WH343            | <b>a</b> | <i>MATa</i> ura3 $\Delta$ 0<br>ho $\Delta$ ::barcode::KanMX4                                                            | Original CBS #: CBS 2808; isolated in 1954 from grapes (Blauer Portugieser); wine yeast, suitable for fruit wines, yields more than 18% of alcohol; barcode #224(Uptag sequence: CCCGTGAATATAAGTGAAGC, Downtag sequence: CCTGGATTTGAAGCGTATAG)                                                                                |
| WH454            | <b>a</b> | <i>MATa</i> ura3 $\Delta$ 0<br>ho $\Delta$ ::barcode::KanMX4                                                            | Original CBS #: CBS 6412; isolated in 1952 from sake; sake yeast; barcode #192(Uptag sequence: CCTTAGGGATAATGAGTTGC, Downtag sequence: CCAGTGTCTAACGTGCAGG)                                                                                                                                                                   |
| WH455            | <b>a</b> | <i>MATa</i> ura3 $\Delta$ 0<br>ho $\Delta$ ::barcode::KanMX4                                                            | Original CBS #: CBS 440; isolated in 1934 in Taiwan from molasses; barcode #249(Uptag sequence: GCCCAGGCTAAATGTTAAGA, Downtag sequence: GAAGTACGCTCAAGACCGAC)                                                                                                                                                                 |
| BC4741<br>(BY41) | <b>a</b> | <i>MATa</i> his3 $\Delta$ 1 leu2 $\Delta$ 0<br>met15 $\Delta$ 0 ura3 $\Delta$ 0 flo8-1<br>ho $\Delta$ ::barcode::KanMX4 | Original CBS #: Lab strain, BY4741; isolated in 1938 in Merced, CA, USA from rotting fig; derived from S288C, of which strain 88% of the gene pool is contributed by strain EM93 (Mortimer and Johnston (1986), Genetics 113: 35). Barcode #266(Uptag sequence: GGCCTAACTCAACAGACGGA, Downtag sequence: GCGCTCGACTAAGAGAAACC) |

614

615

616 **Table S2. Clustering statistics used to rank signaling behavior.** Statistics showing the  
 617 fraction of 17,000 permutations in which strains were clustered with at least 50% of the other  
 618 strains in each mean cluster. These data were used to rank total signaling behaviors from most  
 619 cautious (1) to most reckless (50) based on the fraction of time each strain was associated with  
 620 its mean cluster (characteristic of that cluster). See Figure 2.  
 621

| Rank | Cluster | Strain | MC0    | MC1    | MC3    | MC2    | MC5    | MC4    |
|------|---------|--------|--------|--------|--------|--------|--------|--------|
| 1    | MC0     | W455   | 0.8484 | 0.1516 | 0      | 0      | 0      | 0      |
| 2    | MC0     | W167   | 0.8365 | 0.1635 | 0      | 0      | 0      | 0      |
| 3    | MC1     | W219   | 0.6375 | 0.3625 | 0      | 0      | 0      | 0      |
| 4    | MC1     | W217   | 0.5536 | 0.4460 | 0.0004 | 0      | 0      | 0      |
| 5    | MC1     | W027   | 0.5214 | 0.4755 | 0.0028 | 0.0002 | 0      | 0      |
| 6    | MC1     | W042   | 0.4850 | 0.4892 | 0.0191 | 0.0044 | 0.0023 | 0.0001 |
| 7    | MC1     | W235   | 0.1976 | 0.5532 | 0.2266 | 0.0226 | 0      | 0.0002 |
| 8    | MC1     | W340   | 0.1700 | 0.5803 | 0.2354 | 0.0142 | 0      | 0      |
| 9    | MC1     | W454   | 0.3355 | 0.6610 | 0.0034 | 0      | 0      | 0      |
| 10   | MC1     | W134   | 0.1686 | 0.7376 | 0.0821 | 0.0117 | 0      | 0      |
| 11   | MC1     | W276   | 0.1617 | 0.7643 | 0.0658 | 0.0083 | 0      | 0      |
| 12   | MC1     | W294   | 0.1692 | 0.7834 | 0.0440 | 0.0034 | 0      | 0      |
| 13   | MC1     | W157   | 0.1195 | 0.7851 | 0.0866 | 0.0088 | 0      | 0      |
| 14   | MC1     | W202   | 0.1671 | 0.7855 | 0.0446 | 0.0027 | 0      | 0      |
| 15   | MC1     | W238   | 0.1337 | 0.8048 | 0.0580 | 0.0036 | 0      | 0      |
| 16   | MC1     | W035   | 0.1293 | 0.8086 | 0.0572 | 0.0050 | 0      | 0      |
| 17   | MC1     | W248   | 0.1494 | 0.8331 | 0.0172 | 0.0003 | 0      | 0      |
| 18   | MC3     | W130   | 0.0003 | 0.0671 | 0.7020 | 0.2307 | 0      | 0      |
| 19   | MC3     | W136   | 0      | 0.0092 | 0.6572 | 0.3334 | 0.0002 | 0      |
| 20   | MC3     | W203   | 0.0025 | 0.1348 | 0.6410 | 0.2214 | 0.0002 | 0      |
| 21   | MC3     | W285   | 0.0003 | 0.0806 | 0.6245 | 0.2924 | 0.0022 | 0      |
| 22   | MC3     | W163   | 0.0011 | 0.1474 | 0.6228 | 0.2285 | 0.0002 | 0      |
| 23   | MC3     | W206   | 0      | 0.0036 | 0.6203 | 0.3747 | 0.0014 | 0      |
| 24   | MC3     | BY41   | 0      | 0.0123 | 0.6102 | 0.3768 | 0.0008 | 0      |
| 25   | MC3     | W041   | 0.0002 | 0.0233 | 0.5625 | 0.4090 | 0.0050 | 0      |
| 26   | MC3     | W343   | 0.0012 | 0.0432 | 0.5522 | 0.3910 | 0.0123 | 0.0002 |
| 27   | MC3     | W292   | 0.0201 | 0.1962 | 0.4883 | 0.2893 | 0.0062 | 0      |
| 28   | MC3     | W189   | 0.0001 | 0.0205 | 0.4757 | 0.4715 | 0.0319 | 0.0003 |
| 29   | MC3     | W211   | 0      | 0      | 0.3698 | 0.5572 | 0.0696 | 0.0033 |
| 30   | MC2     | W245   | 0      | 0      | 0.2579 | 0.6898 | 0.0523 | 0      |
| 31   | MC2     | W291   | 0      | 0      | 0.2211 | 0.6786 | 0.0994 | 0.0009 |
| 32   | MC2     | W164   | 0      | 0      | 0.1517 | 0.6601 | 0.1852 | 0.0031 |

|    |     |      |        |        |        |        |        |        |
|----|-----|------|--------|--------|--------|--------|--------|--------|
| 33 | MC2 | W249 | 0      | 0      | 0.3349 | 0.6417 | 0.0233 | 0.0001 |
| 34 | MC2 | W166 | 0      | 0      | 0.3372 | 0.6407 | 0.0220 | 0.0001 |
| 35 | MC2 | W179 | 0      | 0.0002 | 0.3569 | 0.6212 | 0.0217 | 0      |
| 36 | MC2 | W244 | 0      | 0      | 0.1478 | 0.6160 | 0.2225 | 0.0137 |
| 37 | MC2 | W173 | 0      | 0.0003 | 0.3801 | 0.6005 | 0.0188 | 0.0002 |
| 38 | MC2 | W215 | 0      | 0.0012 | 0.3162 | 0.6000 | 0.0815 | 0.0011 |
| 39 | MC2 | W037 | 0      | 0      | 0.0714 | 0.5308 | 0.3863 | 0.0115 |
| 40 | MC2 | W255 | 0      | 0.0011 | 0.4771 | 0.5141 | 0.0077 | 0      |
| 41 | MC2 | W050 | 0      | 0      | 0.0567 | 0.4672 | 0.4417 | 0.0343 |
| 42 | MC5 | W044 | 0      | 0      | 0.0021 | 0.0728 | 0.8501 | 0.0750 |
| 43 | MC5 | W195 | 0      | 0      | 0.0019 | 0.0744 | 0.8501 | 0.0736 |
| 44 | MC5 | W301 | 0      | 0      | 0.0029 | 0.0882 | 0.8203 | 0.0887 |
| 45 | MC5 | W150 | 0.0001 | 0.0004 | 0.0006 | 0.0414 | 0.7978 | 0.1598 |
| 46 | MC5 | W033 | 0      | 0      | 0      | 0.0279 | 0.7196 | 0.2525 |
| 47 | MC5 | W153 | 0      | 0      | 0      | 0.0181 | 0.6545 | 0.3274 |
| 48 | MC4 | W282 | 0      | 0      | 0      | 0      | 0.0596 | 0.9404 |
| 49 | MC4 | W242 | 0      | 0      | 0      | 0.0002 | 0.1477 | 0.8521 |
| 50 | MC4 | W178 | 0      | 0      | 0      | 0.0017 | 0.1697 | 0.8286 |

622

623

624 **Table S3**

625 **Plate key**

626 **Left**

|   | 1         | 2         | 3         | 4         | 5         | 6         |
|---|-----------|-----------|-----------|-----------|-----------|-----------|
| A | W027.BY01 | W044.BY01 | W153.BY01 | W173.BY01 | W203.BY01 | W235.BY01 |
| B | W033.BY01 | W050.BY01 | W157.BY01 | W178.BY01 | W206.BY01 | W238.BY01 |
| C | W035.BY01 | W130.BY01 | W163.BY01 | W179.BY01 | W211.BY01 | W242.BY01 |
| D | W037.BY01 | W134.BY01 | W164.BY01 | W189.BY01 | W215.BY01 | W244.BY01 |
| E | W041.BY01 | W136.BY01 | W166.BY01 | W195.BY01 | W217.BY01 | W245.BY01 |
| F | W042.BY01 | W150.BY01 | W167.BY01 | W202.BY01 | W219.BY01 | W248.BY01 |

627

628 **Right**

|   | 1         | 2         | 3         |
|---|-----------|-----------|-----------|
| A | W249.BY01 | W292.BY01 | W455.BY01 |
| B | W255.BY01 | W294.BY01 |           |
| C | W276.BY01 | W301.BY01 |           |
| D | W282.BY01 | W340.BY01 |           |
| E | W285.BY01 | W343.BY01 |           |
| F | W291.BY01 | W454.BY01 |           |

629

630

631 **Figure legends**

632 **Figure 1. Rate of change in osmotic stress signaling with negative feedback predicts**  
633 **survival and robust recovery of exponential cultures in moderate osmotic stress.**

- 634 A. Time course of mean accumulated *GPD1::GFP* fluorescence in exponential cultures  
635 exposed to 0.75 and 1.5 M KCl. Each point represents an independent replicate  
636 measurement; curves connect strain means at each time (with a minimum of 3 replicates  
637 for each point). In the absence of stress, all strains had high steady-state viability  
638 (propidium iodide dye exclusion; range 96.3 – 98.7%; mean 97.6%) and relatively low  
639 mean GFP fluorescence indicating low background activity of HOG pathway signaling  
640 through the GPD1 promoter and low *GPD1::GFP* accumulation (range 12.7 – 34.8 AU;  
641 mean 18.8 AU).
- 642 B. Pie charts show relative changes in mean viability (shaded area), mortality (white area)  
643 and *GPD1::GFP* accumulation (opacity level) after 2 hours in 0.75M KCl. Strains  
644 ordered by viability at 2 hours. The viability at 2 hours was proportional to the 2 hour  
645 viability of non-disrupted controls having two intact copies of the GPD1 gene ( $R^2 =$   
646  $0.7085$ ;  $P < 0.0001$ ; not shown).
- 647 C. Relationship between mean *GPD1::GFP* accumulation and viability in mid-exponential  
648 cultures exposed to 0.75 M KCl for 0, 2, 4, and 6 hours (h). Each data point represents  
649 the average of at least three replicates per strain (~10,000 cells/ sample). The ellipses  
650 indicate correlations between viability and fluorescence at  $\alpha = 0.95$ . The inserts show  
651 relationships between changes in *GPD1::GFP* and viability over each time interval.
- 652 D. Plausible integral feedback drives a robust recovery of steady-state viability after 4 hours  
653 in 0.75 M KCl. Integrating feedback control would assure perfect adaptation of stress  
654 responses, water balance and steady state viability (included manuscript in preparation).  
655 By linear regression  $\text{recovery} = (0.7670) \text{ early mortality} + 3.4936$  ( $R^2 = 0.9351$ ;  $P <$   
656  $0.0001$ ). Note that the persistence in cultures of dead cells over the course of the  
657 experiment precludes 100% recovery of steady-state viability, the data fit a model  
658 whereby surviving cells in adapted strains undergo 3 cell divisions.

659  
660 **Figure 2. Continuous variation in signaling behaviors and survival of postdiauxic cultures**  
661 **exposed to severe osmotic stress.**

- 662 A. Strains classified by mean cluster (MC0 – MC5) and ranked top (1) to bottom (50)  
663 according to changes in *GPD1::GFP* accumulation over time (see Table S2 and methods).  
664 Each time point shows representative distributions of *GPD1::GFP* accumulation (green)  
665 and relative survival red (99.7% viability) to blue (11.7% viability). Cells above the 89<sup>th</sup>  
666 percentile (top 11%) are shown in black. Prior to osmotic challenge steady-state viabilities  
667 were uniformly high (range 93.0 – 99.6%; mean 98.2%). Rank-ordered mean clusters are  
668 topographically equivalent to a sequential ordering.

669 B. Relative viability of post-diauxic cultures (WXXX.BY01 controls) incubated in 3 M KCl  
670 before plating on iso-osmolar media. Cultures were re-ordered according to the ranked  
671 signaling behavior given in Figure 2A. The same experiment as originally plated is shown  
672 in Figure S1. Strains are color-coded as in Figure 1C for comparison of exponential and  
673 post-diauxic cultures.

674  
675 **Figure 3. A simple bet hedging model with heritable proportions of cautious and reckless**  
676 **cells produces observed variation in survival.**

677 A. Cells with the most aggressive signaling began to die after long periods in severe stress  
678 leaving increasing fraction of cells with lower *GPD1::GFP* accumulations. Shown are  
679 distributions of accumulated *GPD1::GFP* and viability in replicate cultures of W242 (rank  
680 49) in 5 replicate cultures after 168 hours in 2.5 M KCl. Mean ( $\bar{x}$ ), standard deviation  
681 (std), and weight ( $w$ ; the fraction of cells in each distribution) are given. Sum (red)  
682 shows the cumulative fit of the 4 learned Gaussians.

683 B. Static viability of post-diauxic cells of strain W027 exposed to 3 M in microfluidic  
684 chambers. Individual cell behaviors mirror population behaviors measured by flow  
685 cytometry – e.g longer lag periods and increased accumulations of *GPD1::GFP* with  
686 increasing osmotic stress. Colored traces indicate accumulated fluorescence in  
687 representative cells in 1.5 (green), 2.0 (blue), 2.5 (red) and 3.0 M KCl (yellow). Arrows  
688 indicate average time to the first cell division  $\pm$  standard deviations.

689 C. A simple 2-state bet hedging model with heritable production of cautious (static) and  
690 reckless cell types. Bet hedging strategy  $P$  was defined as the probability of cautious  
691 cells for  $0 \leq P \leq 1$ . Relative fitness was measured for all strategies after 10 generations in  
692 each environment. All nine possible 2-state environmental shifts between three general  
693 osmotic stress environments were considered: permissive (E0; all cells grow equally well),  
694 restrictive (E1; reckless cells divide, cautious cells survive without dividing), and killing  
695 (E2; reckless cells die, cautious cells survive without cell division). Bet hedging and  
696 intermediate strategies ( $0 < P < 1$ ) were most fit only when the environment shifted from  
697 moderate to more severe (E1  $\rightarrow$  E2). When E1 was the first environment, the optimum  
698 strategy  $P$  depended on generation number.

699  
700 **Movie 1. Higher relative fitness of post-diauxic cells in extreme stress.** Exponential  
701 W027.G01 seeded with a single post-diauxic cell of the same genotype (box). Cells were allowed  
702 to grow for 4 hours and then exposed to 1.5 M KCl at time 0h. Most cells rapidly die (as they fill  
703 with vacuoles) however the single post-diauxic cell expresses a high level of *GPD1::GFP*, adapts,  
704 and begins to divide.

705

706 **Movie 2. Adaptation and growth of post diauxic cells.** After about 4 hours in 1.5 M KCl  
707 W027.G01 express high levels of *GPD1::GFP*, adapt, and begin to divide. Cells that did not  
708 express *GPD1::GFP* accumulate vacuoles and die.

709  
710 **Movie 3. Reckless cells attempt to divide and fail in extreme osmotic stress.** After 30  
711 hours in 2.5 M KCl some post diauxic W027.G01 induce GFP to high levels, attempt cell division  
712 and pop, killing both mother and daughter. We think all strains have both cautious and reckless  
713 cell types; W027 (rank 5) is a relatively cautious strain.

714  
715 **Figure S1. Monophasic *GPD1::GFP* accumulations in exponential cultures is described**  
716 **well by distribution means.** Representative samples of exponential cultures exposed to 0.75  
717 M KCl for the times shown. Learned distributions of *GPD1::GFP* accumulation with mean ( $\bar{x}$ ),  
718 standard deviation (std), and weight ( $w$ ; the fraction of cells in each distribution) are given  
719 (zero-weighted distributions not shown). Sum (red) shows the cumulative fit of the 4 learned  
720 Gaussians. The 18 representative strains are color-coded as in Figure 1B.

721  
722 **Figure S2. Static viability and survival of post-diauxic cultures in extreme osmotic stress.**  
723 Strains were incubated for up to 5 weeks in 3 M KCl before plating on iso-osmolar media. A  
724 plate key is given in Table S3; the same data sorted by rank are shown in Figure 2B. This  
725 experiment, a qualitative assessment of viability, was repeated only once.

726  
727 **Figure S3a–c. Reproducibility of multiphasic distributions of *GPD1::GFP* in post diauxic**  
728 **cultures under severe osmotic stress.** Representative replicates of post-diauxic cultures  
729 exposed to 2.5 M KCl for the times shown. Learned distributions of *GPD1::GFP* accumulation  
730 with mean ( $\bar{x}$ ), standard deviation (std), and weight ( $w$ ; the fraction of cells in each distribution)  
731 are given (zero-weighted distributions not shown). Sum (red) shows the cumulative fit of the 4  
732 learned Gaussians. The 18 representative strains are color-coded as in Figure 1B.

733  
734 **Figure S4. Rank predicts increasingly aggressive osmotic stress signaling behavior.** The  
735 average percent of cells in each strain above a threshold set at the top 11% of accumulation of  
736 *GPD1::GFP* normalized across all post-diauxic cultures. Strains were exposed to 2.5 M KCl for  
737 increasing times shown and ordered according to rank. The number of strains in each mean  
738 clusters are indicated with increasingly lighter grey scale in their order of “recklessness” signaling  
739 (MC0, MC1, MC3, MC2, MC5, MC4). The numbers of strains in each mean cluster are 2 (MC0),  
740 15 (MC1), 12 (MC3), 12 (MC2), 6 (MC5), 3 (MC4). The 18 representative strains are color-coded  
741 as in Figure 1B.

742  
743 **Figure S5. Mean cluster membership predicts viability over time in 2.5 M KCl.** Shown are  
744 average viabilities among strains in each mean cluster and time point (shading). Asterisks



745 indicate significance at the  $\leq 0.05$  level by ANOVA or, where appropriate, Welch's ANOVA. The  
746 numbers of strains in each mean cluster are 2 (MC0), 15 (MC1), 12 (MC2), 12 (MC3), 3 (MC4), 6  
747 (MC5; see Figure 2). Horizontal lines indicate the overall average viability (50 strains) at each  
748 time point.  
749
